# Supplementary material
Source: PubMed Central journal article supplement (PMC10570889)
Supplement: jamaotolaryngolheadnecksurg-e232419-s001.pdf [file jamaotolaryngolheadnecksurg-e232419-s001.pdf]

## Data Sharing Statement

Shochat. Do-It-Yourself Low-Cost Stroboscopy. *JAMA Otolaryngol Head Neck Surg*. Published August 24, 2023. doi:10.1001/jamaoto.2023.2419

### Data

**Data available:** Yes

**Data types:** Other (please specify)

**Additional Information:** The code, diagram, and any and all available information is and will be open sourced

**How to access data:** <https://github.com/shvecht/vocalStrobe>

**When available:** With publication

### Supporting Documents

**Document types:** None

### Additional Information

**Who can access the data:** anyone requesting the data

**Types of analyses:** for any purpose

**Mechanisms of data availability:** with investigator support
